# Supplementary material for: A Systematic Review of Qualitative Research Literature and a Thematic Synthesis of Older LGBTQ People’s Experiences of Quality of Life, Minority Joy, Resilience, Minority Stress, Discrimination, and Stigmatization in Japan and Sweden
Source: Preprints.org preprint supplement (doi:10.20944/preprints202304.0622.v1), 2023-04-20
Supplement: Supplementary file 3 [file Review_protocol_Swedish_Japanese_literature_supplemantary file.docx]

**Review title**

A systematic review of qualitative research literature and a thematic synthesis of older LGBTQ people’s experiences of quality of life, minority joy, resilience, minority stress, discrimination, and stigmatization in Japan and Sweden

**Japanese title:**

日本とスウェーデンにおけるLGBTQ高齢者が持つ生活の質、マイノリティジョイ、レジリエンス、マイノリティストレス、差別、スティグマについての経験に関する文献のシステマティックレビューによる質的調査

**Swedish title:**

En systematisk översikt av kvalitativ forskningslitteratur och en tematisk syntes över äldre hbtq-personers erfarenheter och upplevelser av livskvalitet, minoritetsglädje, motståndskraft (resiliens), minoritetsstress, diskriminering och stigmatisering i Japan och Sverige

**Start date**

The first Japanese searches were conducted in September 2021 and the first Swedish searches were conducted in January 2022.

**Anticipated completion date**

January 2023.

**Stage of review at time of this submission**

|  | Started | Completed |
| --- | --- | --- |
| Preliminary searches | X | X |
| Piloting of the study selection process | X | X |
| Formal screening of search results against eligibility criteria | X | X |
| Data extraction | X | X |
| Risk of bias/ quality assessment | X | X |
| Data analysis | X | X |

**Named contact**

Anna Bratt, PhD [anna.bratt@lnu.se](mailto:anna.bratt@lnu.se)

Linnaeus University, Department of Psychology, 351 95 Växjö, Sweden

Phone: +46470 76 78 20

**Review members´ and organizational affiliations**

Anna Bratt, PhD, Department of Psychology, Linnaeus University, Sweden

Richard Huntley, Department of Psychology, Linnaeus University, Sweden

Matilda Wurm, PhD, School of Law, Psychology and Social Work, Örebro University, Sweden

Ann-Christine Petersson Hjelm, PhD, Associate professor, Department of Business Studies; Commercial law, Uppsala University, Sweden

Tsukasa Muraya, PhD, Faculty of Design, Kyushu University, Japan

Yoshihisa Hirakawa, PhD, professor, Public Health and Health Systems, Nagoya University, Japan

**Funding**

MIRAI 2.0 – Joint seed funding of Japan-Sweden collaborative projects

**Conflict of interest**

No financial or personal conflicts of interest.

**Review questions**

What is the existing Swedish and Japanese research on older LGBTQ people, aged 60 or older, regarding quality of life, minority joy, resilience, minority stress, and discrimination/stigmatization?

**Inclusion criteria:**

1). Peer-reviewed research articles from either Sweden or Japan.

2). Research of older LGBTQ people 60 years or older with first-hand experiences from the participants.

**16. Searches**

**Swedish searches**

1. AB conducted preliminary searches with the guidance of a librarian at Linnaeus University and collected keywords from relevant articles written by experts in the field of older LGBTQ adults, and in combination with database-specific search terms (thesaurus). Only **peer-reviewed** articles were included in the selected databases.

2. Databases relevant to the intersection of psychology, sociology, and medicine/psychiatry, which are the main areas of our interest, were selected because they coincide with the topic of the review: ASSIA, Cinahl, Medline, Psych INFO, and Social Abstracts. The searches were conducted separately, one database at a time, in order to use both keywords and specific thesaurus-words, because the latter vary in different databases. In addition, Swedish research literature was searched in the Swedish databases LIBRIS, DIVA, and SwePub. LIBRIS is the Swedish libraries database, and on DIVA, dissertations, research publications, and student essays from most Swedish universities and colleges can be found. SwePub is a database for research publications from about 40 Swedish Universities.

**Japanese searches**

Start date of the searches: September 7, 2021.

1. TM conducted preliminary searches of the Database of Kyushu University Library and collected keywords from relevant articles written by experts in the field of older LGBTQ adults, and in combination with database-specific search terms (thesaurus).

Only peer-reviewed articles were included in the selected databases.

2. Japanese articles were relevant to

CiNii Articles

CiNii Articles, NII Scholarly, and Academic Information Navigator, provides academic paper information, concentrating mainly on Japanese language academic papers.

Japan Medical Articles Society

Contains periodicals in the fields related to medicine, dentistry, and pharmacy published by universities, academic societies, research institutes, and hospitals in Japan.

**17. URL to the International search strategy**

**ASSIA: 48 results**

ti,ab,su(Lesbian* OR Gay OR bisexual* OR Transgender* OR Transgenderism OR Queer* OR lntersex* OR Intersexuality OR LGBTQ* OR LGBT OR LGBTQI OR LGB OR homosexu* OR "gender identity" OR "sex role identity" OR "gender minorit*" OR "sexual minorit*" OR "gender nonconformi*" OR "gender non-conformi*" OR transsexual* OR Transexual* OR "gender nonbinary" OR "gender non-binary" OR TGNC OR "Third gender" OR agender) AND (ti,ab("old* age" OR ageing OR aging OR older OR elder* OR senior*) OR (MESH.EXACT("Aging") OR (MESH.EXACT("Aged") OR MESH.EXACT("Aged, 80 & over")) OR MESH.EXACT("Aged, 80 & over")) OR (MAINSUBJECT.EXACT("Ageing") OR MAINSUBJECT.EXACT("Elderly people") OR MAINSUBJECT.EXACT("Older people") OR MAINSUBJECT.EXACT("Older women") OR MAINSUBJECT.EXACT("Older men") OR MAINSUBJECT.EXACT("Very old"))) AND ti,ab,su(discriminat* OR stigma* OR Stigmatization OR ageis* OR stereotyp* OR Prejudice*) AND (ti,ab,su((Qualitative) NEAR/1 (method* OR stud* OR research OR analysis OR data)) OR ti,ab,su(("semi-structured" OR semistructured OR "in-depth" OR indepth OR "face-to-face" OR "face to face") NEAR/1 (interview*)) OR ti,ab,su("focus group*" OR "interviews as topic" OR narration OR "personal narratives as topic" OR "Grounded Theory" OR Phenomenolog* OR "Thematic Analysis" OR "Narrative Analysis" OR Hermeneutic*)) AND (la.exact("ENG") AND PEER(yes))

**Cinahl: 189 results**

TI ( Lesbian* OR Gay OR bisexual* OR Transgender* OR Transgenderism OR Queer* OR lntersex* OR Intersexuality OR LGBTQ* OR LGBT OR LGBTQI OR LGB OR homosexu* OR "gender identity" OR "sex role identity" OR "gender minorit*" OR "sexual minorit*" OR "gender nonconformi*" OR "gender non-conformi*" OR transsexual* OR Transexual* OR "gender nonbinary" OR "gender non-binary" OR TGNC OR "Third gender" OR agender ) OR AB ( Lesbian* OR Gay OR bisexual* OR Transgender* OR Transgenderism OR Queer* OR lntersex* OR Intersexuality OR LGBTQ* OR LGBT OR LGBTQI OR LGB OR homosexu* OR "gender identity" OR "sex role identity" OR "gender minorit*" OR "sexual minorit*" OR "gender nonconformi*" OR "gender non-conformi*" OR transsexual* OR Transexual* OR "gender nonbinary" OR "gender non-binary" OR TGNC OR "Third gender" OR agender ) OR SU ( Lesbian* OR Gay OR bisexual* OR Transgender* OR Transgenderism OR Queer* OR lntersex* OR Intersexuality OR LGBTQ* OR LGBT OR LGBTQI OR LGB OR homosexu* OR "gender identity" OR "sex role identity" OR "gender minorit*" OR "sexual minorit*" OR "gender nonconformi*" OR "gender non-conformi*" OR transsexual* OR Transexual* OR "gender nonbinary" OR "gender non-binary" OR TGNC OR "Third gender" OR agender ) se bilaga, inte fullständigt

**Medline: 248 results**

ti,ab,su(Lesbian* OR Gay OR bisexual* OR Transgender* OR Transgenderism OR Queer* OR lntersex* OR Intersexuality OR LGBTQ* OR LGBT OR LGBTQI OR LGB OR homosexu* OR "gender identity" OR "sex role identity" OR "gender minorit*" OR "sexual minorit*" OR "gender nonconformi*" OR "gender non-conformi*" OR transsexual* OR Transexual* OR "gender nonbinary" OR "gender non-binary" OR TGNC OR "Third gender" OR agender) AND (ti,ab("old* age" OR ageing OR aging OR older OR elder* OR senior*) OR (MESH.EXACT("Aging") OR MESH.EXACT("Aged") OR MESH.EXACT("Aged, 80 and over"))) AND ti,ab,su(discriminat* OR stigma* OR Stigmatization OR ageis* OR stereotyp* OR Prejudice*) AND (ti,ab,su((Qualitative) NEAR/1 (method* OR stud* OR research OR analysis OR data)) OR ti,ab,su(("semi-structured" OR semistructured OR "in-depth" OR indepth OR "face-to-face" OR "face to face") NEAR/1 (interview*)) OR ti,ab,su("focus group*" OR "interviews as topic" OR narration OR "personal narratives as topic" OR "Grounded Theory" OR Phenomenolog* OR "Thematic Analysis" OR "Narrative Analysis" OR Hermeneutic*)) AND la.exact("ENG")

**PsychINFO: 420 results**

ti,ab,su(Lesbian* OR Gay OR bisexual* OR Transgender* OR Transgenderism OR Queer* OR lntersex* OR Intersexuality OR LGBTQ* OR LGBT OR LGBTQI OR LGB OR homosexu* OR "gender identity" OR "sex role identity" OR "gender minorit*" OR "sexual minorit*" OR "gender nonconformi*" OR "gender non-conformi*" OR transsexual* OR Transexual* OR "gender nonbinary" OR "gender non-binary" OR TGNC OR "Third gender" OR agender) AND (ti,ab("old* age" OR ageing OR aging OR older OR elder* OR senior*) OR (MESH.EXACT("Aging") OR MESH.EXACT("Aged") OR MESH.EXACT("Aged, 80 and over")) OR (age.exact("Aged (65 Yrs & Older)") OR age.exact("Very Old (85 Yrs & Older)")) OR (MAINSUBJECT.EXACT("Aging") OR MAINSUBJECT.EXACT("Aging (Attitudes Toward)") OR MAINSUBJECT.EXACT("Older Adulthood"))) AND ti,ab,su(discriminat* OR stigma* OR Stigmatization OR ageis* OR stereotyp* OR Prejudice*) AND (ti,ab,su((Qualitative) NEAR/1 (method* OR stud* OR research OR analysis OR data)) OR ti,ab,su(("semi-structured" OR semistructured OR "in-depth" OR indepth OR "face-to-face" OR "face to face") NEAR/1 (interview*)) OR ti,ab,su("focus group*" OR "interviews as topic" OR narration OR "personal narratives as topic" OR "Grounded Theory" OR Phenomenolog* OR "Thematic Analysis" OR "Narrative Analysis" OR Hermeneutic*)) AND (la.exact("ENG") AND PEER(yes))

**Social Abstracts: 50 results**

ti,ab,su(Lesbian* OR Gay OR bisexual* OR Transgender* OR Transgenderism OR Queer* OR lntersex* OR Intersexuality OR LGBTQ* OR LGBT OR LGBTQI OR LGB OR homosexu* OR "gender identity" OR "sex role identity" OR "gender minorit*" OR "sexual minorit*" OR "gender nonconformi*" OR "gender non-conformi*" OR transsexual* OR Transexual* OR "gender nonbinary" OR "gender non-binary" OR TGNC OR "Third gender" OR agender) AND (ti,ab("old* age" OR ageing OR aging OR older OR elder* OR senior*) OR (MESH.EXACT("Aging") OR MESH.EXACT("Aged") OR MESH.EXACT("Aged, 80 & over")) OR (MAINSUBJECT.EXACT("Aging") OR MAINSUBJECT.EXACT("Elderly") OR MAINSUBJECT.EXACT("Older people"))) AND ti,ab,su(discriminat* OR stigma* OR Stigmatization OR ageis* OR stereotyp* OR Prejudice*) AND (ti,ab,su((Qualitative) NEAR/1 (method* OR stud* OR research OR analysis OR data)) OR ti,ab,su(("semi-structured" OR semistructured OR "in-depth" OR indepth OR "face-to-face" OR "face to face") NEAR/1 (interview*)) OR ti,ab,su("focus group*" OR "interviews as topic" OR narration OR "personal narratives as topic" OR "Grounded Theory" OR Phenomenolog* OR "Thematic Analysis" OR "Narrative Analysis" OR Hermeneutic*)) AND (la.exact("ENG") AND PEER(yes))

**Total international searches:** **n= 955**

**Swedish searches:**

**LIBRIS: 41 results of which all were book chapters and not peer-reviewed articles**

(LHBTQ OR HBT OR HBTQ* OR HBTQI OR GLBT* OR homsexue* OR lesbisk* OR bisexuel* OR trans OR transperson* OR queer* OR intersex* OR transsexualism OR könsidentitet* OR könsuttryck*) (äldre* OR ålder* OR åldrande* OR senior* OR gamling*)

**SwePub: 26 results of which 3 were peer-reviewed articles (Siverskog 2014, 2015, and 2019)**

(LHBTQ OR HBT OR HBTQ* OR HBTQI OR GLBT* OR homsexue* OR lesbisk* OR bisexuel* OR trans OR transperson* OR queer* OR intersex* OR transsexualism OR könsidentitet* OR könsuttryck*) (äldre* OR ålder* OR åldrande* OR senior* OR gamling*)

**DIVA: 71 results of which 15 were peer-reviewed articles**

HBTQ OR homsexue* OR lesbisk* OR bisexuel* OR trans OR transperson* OR queer* OR intersex* OR transsexualism

**Swedish searches: n=138**

**Japanese Search**

CiNii Articles

Results: 5

（LGBT OR　LGBTQ　OR　性的マイノリティ　OR　性的少数者　OR　セクシュアル・マイノリティ） AND　（ケア　OR　介護）　AND　高齢

Results: 22

（LGBT OR　LGBTQ　OR　性的マイノリティ　OR　性的少数者　OR　セクシュアル・マイノリティ）　AND　高齢

Japan Medical Articles Society

Results: 15

（LGBT or LGBTQ　or　性的マイノリティ　or　性的少数者　or　セクシュアル・マイノリティ） （ケア　or　介護）　高齢

Results: 56

（LGBT or LGBTQ　or　性的マイノリティ　or　性的少数者　or　セクシュアル・マイノリティ）　高齢

In total 98 Japanese articles

**In total**

1191 articles

**Duplicates**

431 articles

**Screening for eligibility: 760 articles**

**Excluded:**

Not Swedish or Japanese research= 540 articles

Not peer reviewed: 120 Swedish and 97 Japanese papers= n= 217

Not the right age group= 1 Swedish (Kottorp 2016 + 1 Japanese (Kitajima & Sugisawa 2018) = n=3

Not older LGBTQ adults, included healthcare professionals (Smolle & Espvall 2021)

**Selected: 5 Swedish articles 0 Japanese**

Included in the synthesis= 4 papers, one paper was excluded because it was not about LGBTQ experiences only; age-related issues.
